1 **Title: SARS-CoV-2 Seroepidemiology in Children and Adolescents**

2 Rebecca E Levorson, Erica Christian, Brett Hunter, Jasdeep Sayal, Jiayang Sun, Scott A Bruce,  
3 Stephanie Garofalo, Matthew Southerland, Svetlana Ho, Shira Levy, Christopher Defillipi, Lilian  
4 Peake, Frederick C Place\*, Suchitra K Hourigan\*

5 \*Authors contributed equally

- 6
- 7 1. Rebecca E Levorson, MD. Inova Children's Hospital. 3300 Gallows Rd, Falls Church,  
8 VA 22042. and Pediatric Specialists of Virginia, 3023 Hamaker Court, Fairfax, VA  
9 22031.
  - 10 2. Erica Christian, MS. Inova Children's Hospital. 3300 Gallows Rd, Falls Church, VA  
11 22042
  - 12 3. Brett Hunter, PhD. Department of Statistics, George Mason University. 4400 University  
13 Dr, Fairfax, VA 22030
  - 14 4. Jasdeep Sayal, MBA. Inova Children's Hospital. 3300 Gallows Rd, Falls Church, VA  
15 22042
  - 16 5. Jiayang Sun, PhD. Department of Statistics, George Mason University. 4400 University  
17 Dr, Fairfax, VA 22030
  - 18 6. Scott A Bruce, PhD. Department of Statistics, George Mason University. 4400 University  
19 Dr, Fairfax, VA 22030
  - 20 7. Stephanie Garofalo, RN. Inova Heart and Vascular Institute. 3300 Gallows Rd, Falls  
21 Church, VA 22042.
  - 22 8. Matthew Southerland, BS. Inova Heart and Vascular Institute. 3300 Gallows Rd, Falls  
23 Church, VA 22042.
  - 24 9. Svetlana Ho, MD. Inova Children's Hospital. 3300 Gallows Rd, Falls Church, VA 22042
  - 25 10. Shira Levy, MA. Inova Children's Hospital. 3300 Gallows Rd, Falls Church, VA 22042
  - 26 11. Christopher Defillipi, MD. Inova Heart and Vascular Institute. 3300 Gallows Rd, Falls  
27 Church, VA 22042.
  - 28 12. Lilian Peake, MD, MPH. Virginia Department of Health. 109 Governor Street,  
29 Richmond, VA 23219.
  - 30 13. Frederick C Place, MD. Inova Children's Hospital. 3300 Gallows Rd, Falls Church, VA  
31 22042
  - 32 14. Suchitra K Hourigan, MD. Inova Children's Hospital. 3300 Gallows Rd, Falls Church,  
33 VA 22042 and Pediatric Specialists of Virginia, 3023 Hamaker Court, Fairfax, VA  
34 22031..

35

36 **Corresponding author:** Suchitra K Hourigan, MD. Inova Children's Hospital. 3300 Gallows  
37 Rd, Falls Church, VA 22042. Email:suchihourigan@gmail.com. Tel: 410-917-3331.

38

39 **Short title:** SARS-CoV-2 Seroepidemiology in Children

40

41

42

43 **Conflict of Interest Disclosures:**

44 Author Christopher Defillipi consults for Ortho Diagnostics, Abbott Diagnostics, and Siemens  
45 Healthineers. No other authors have any conflicts of interest relevant to this article to disclose.

46 **Funding/Support and Role of Funder:**

47 The Virginia Department of Health provided funding for this study. The Virginia Department of  
48 Health, in conjunction with the authors of this manuscript, were involved in study design, the  
49 writing of the report and the decision to submit the paper for publication. The Virginia  
50 Department of Health were not involved in collection, analysis or interpretation of the data.  
51 Research reported in this publication was also supported in part by the National Institute of Child  
52 Health and Human Development under Award Number K23HD099240 (Hourigan). Research  
53 reported in this publication was also supported in part via a subcontract from the parent award by  
54 the National Center for Advancing Translational Sciences of the National Institutes of Health  
55 under Award Number UL1TR003015 (Hunter, Sun, Bruce). The content is solely the  
56 responsibility of the authors and does not necessarily represent the official views of the National  
57 Institutes of Health.

58

59 **Article Summary:** 8.5% of children had SARS-CoV-2 antibodies in Fall 2020, double the adult  
60 rate. The role of pediatric infection is important to consider in mitigation strategies.

61 **What's Known on This Subject:**

62 SARS-CoV-2 pediatric seroepidemiologic data is limited. Reported viral rates underestimate the  
63 burden of infection in children due to mild or asymptomatic disease. Limited cohorts of children  
64 suggest low seropositivity rates compared to adults.

65 **What This Study Adds:**

66 US children in the largest SARS-CoV-2 seroepidemiology study to date had double the rate of  
67 antibodies compared to adults. Most children were asymptomatic. Risk factors include age,  
68 ethnicity and living conditions. Most children made antibodies to different antigens of SARS-  
69 CoV-2.

70

71

72

73

74

75

76 **Contributor's Statement**

77 Dr Levorson, Dr Place and Dr Hourigan conceptualized and designed the study, enrolled  
78 subjects, and/or collected clinical samples and data, drafted the initial manuscript and reviewed  
79 and revised the manuscript.

80 Ms Christian, Ms Sayal, Ms Levy and Dr Ho enrolled subjects, and/or collected clinical samples  
81 and data and reviewed and revised the manuscript.

82 Dr Hunter, Dr Sun and Dr Bruce conceptualized and designed the study, performed statistical  
83 analyses of the data and reviewed and revised the manuscript.

84 Mr Southerland performed and provided oversight of laboratory analyses and reviewed and  
85 revised the manuscript.

86 Ms Garofalo, Dr Defillipi and Dr Peake conceptualized and designed the study and reviewed and  
87 revised the manuscript.

88 All authors approved the final manuscript as submitted and agree to be accountable for all  
89 aspects of the work.

90

91

92

93

94

95

96

97

98

99

100

101 **Abstract**

102 **Objectives:** Pediatric SARS-CoV-2 data remain limited and seropositivity rates in children were  
103 reported as <1% early in the pandemic. Seroepidemiologic evaluation of SARS-CoV-2 in  
104 children in a major metropolitan region of the United States was performed.

105 **Methods:** Children and adolescents  $\leq 19$  years were enrolled in a cross-sectional, observational  
106 study of SARS-CoV-2 seroprevalence from July-October 2020 in Northern Virginia, United  
107 States. Demographic, health, and COVID-19 exposure information was collected, and blood was  
108 analyzed for SARS-CoV-2 spike protein total antibody. Risk factors associated with SARS-  
109 CoV-2 seropositivity were analyzed. Orthogonal antibody testing was performed, and samples  
110 were evaluated for responses to different antigens.

111 **Results:** In 1038 children, the anti-SARS-CoV-2 total antibody positivity rate was 8.5%. After  
112 multivariate logistic regression, significant risk factors included Hispanic ethnicity, public or  
113 absent insurance, a history of COVID-19 symptoms, exposure to person with COVID-19, a  
114 household member positive for SARS-CoV-2 and multi-family or apartment dwelling without a  
115 private entrance. 66% of seropositive children had no symptoms of COVID-19. Orthogonal  
116 antibody testing with a receptor binding domain specific antigen revealed a high concordance of  
117 80.5%. Children also demonstrated a robust immune response to the nucleocapsid antigen.

118 **Conclusions:** A much higher burden of SARS-CoV-2 infection, as determined by seropositivity,  
119 was found in children than previously reported; this was also higher compared to adults in the  
120 same region at a similar time. Contrary to prior reports, we determined children shoulder a  
121 significant burden of COVID-19 infection. The role of children's disease transmission must be  
122 considered in COVID-19 mitigation strategies including vaccination.

123

124 Key Words: COVID-19; SARS-CoV-2; serology; antibody; seroprevalence; children; pediatrics

125

126

127

128

129

130

131

## 132 **Introduction**

133 Current epidemiologic data in the United States (US) and globally indicating sustained community  
134 transmission of SARS-CoV-2 is indisputable. The extent of SARS-CoV-2 community transmission  
135 remains incompletely understood, particularly regarding children. Initially, our understanding was  
136 dependent upon aggregate molecular testing for acute infection and largely missed mild and  
137 asymptomatic infections. Based on this data, early reports misleadingly suggested that children were  
138 largely spared infection from SARS-CoV-2 [1,2].

139 Seroprevalence estimates can be useful to understand the true cumulative incidence in a given population.  
140 Antibody seropositivity provides data about asymptomatic or subclinical infections that would not be  
141 detected by surveillance relying on interactions with the health care system. Limited pediatric  
142 seroprevalence data exist for SARS-CoV-2. Following the first pandemic wave in Spain, up to a 6.2%  
143 seropositivity was reported late April/early May 2020, with only 3.8% of children aged 0-19 years being  
144 seropositive [3]. Antibody positivity in a smaller population-based study in Switzerland in mid-May 2020  
145 was lowest in children 0-9 years at 0.8%, compared with adults aged 20-49, at 9.9% [4]. Similarly, in  
146 Germany a low seropositivity rate of 0.6% was reported in children aged 1-10 years [5],

147 An investigation in spring 2020 evaluated children for SARS-CoV-2 antibodies 8-10 weeks after a large  
148 school outbreak in Santiago, Chile. Anti-SARS-CoV-2 antibodies were present in 10% of children,  
149 whereas 17% of adult staff were seropositive. Forty percent of seropositive children were categorized as  
150 asymptomatic [6]. Outside of this outbreak associated investigation, there have been no large pediatric  
151 focused seroprevalence studies in the Americas.

152 Compared to adults, preliminary evidence in children suggests a distinct antibody response to SARS-  
153 CoV-2 infection, with a reduced breadth of anti-SARS-CoV-2 antibodies, specifically a reduction in anti-  
154 nucleocapsid antibody production [7]. Furthermore, the possibility has been raised that children may have

155 a higher prevalence of antibodies against the S2 unit of the SARS-CoV-2 spike protein, which may be  
156 partially due to cross-reactivity to conserved epitopes in benign seasonal human coronaviruses [8].

157 As there is extremely limited data regarding the burden of SARS-CoV-2 infection in children, especially  
158 in the US, the primary objective of this study was to determine SARS-CoV-2 seroprevalence in children  
159 residing in Northern Virginia in the US. Northern Virginia is the most populous and urbanized region of  
160 Virginia and is geographically linked to the Washington, D.C. metropolitan area. Secondary objectives  
161 included identification of risk factors associated with SARS-CoV-2 seropositivity in children, orthogonal  
162 antibody testing to assess the accuracy of antibody testing in children and evaluation of immunologic  
163 responses to different antigens of SARS-CoV-2 in children.

164

## 165 **Methods**

166 Children and adolescents were enrolled in this cross-sectional, observational study over a 10-week period,  
167 from July 31 to October 13, 2020. Verbal informed consent was obtained from parents and adolescents  
168  $\geq 18$  years. The Inova Health Systems Human Research Protection Office waived ethics approval as per  
169 CFR 45 46.102, as this project was a public health surveillance activity, funded by the Virginia  
170 Department of Health (VDH). During the study period, public schools in Northern Virginia were closed  
171 to in-person learning although, some childcare facilities remained open. An indoor mask mandate outside  
172 the home was in effect; however, this was only for children  $\geq 10$  years and adults.

173 Subjects were recruited from three settings in Northern Virginia: 1) non-emergency health care settings  
174 (including pediatric primary care offices, pediatric specialty clinics and pre-surgical areas for elective  
175 procedures); 2) self-referral in response to advertisement of the study, and 3) the Inova Children's  
176 Hospital Pediatric Emergency Department and limited enrollment from inpatient units. Inclusion criteria  
177 were  $\leq 19$  years (the age range defined as a child for COVID-19 reporting by the state of Virginia) and  
178 residence in Virginia. Only one individual per household was permitted to enroll in the study. Exclusion

179 criteria included receipt of immunoglobulin therapy within the past 11 months, including intravenous  
180 immunoglobulin, whole blood, fresh frozen plasma, experimental therapy with convalescent plasma, or  
181 other blood product transfusions, except for packed red blood cells and platelets.

182 Enrolled participants completed a questionnaire collecting demographic, health and potential COVID-19  
183 exposure information. Blood was collected by venipuncture, either for the sole purpose of the study or in  
184 conjunction with another clinical blood draw. Blood was tested using the US Food and Drug  
185 Administration emergency use authorized Ortho Clinical Diagnostics VITROS Immunodiagnostic  
186 Products Anti-SARS-CoV-2 Total test (Ortho Clinical) performed on the Vitros 3600 system (Ortho  
187 Clinical Diagnostics, Raritan, NJ) to detect total antibody (IgG, IgA and IgM) responses against the  
188 SARS-CoV-2 spike protein. This assay has a reported clinical specificity of 100% (95% CI: 99.1-100%)  
189 [9]. Samples were documented as reactive ( $\geq 1.00$  S/Co) or non-reactive ( $< 1.00$  S/Co) for anti-SARS-  
190 CoV-2.

191 Orthogonal antibody testing was performed on reactive samples as the estimated prevalence prior to the  
192 study was 1%, based on very limited data at the time.<sup>4</sup> Orthogonal serologic testing was recommended by  
193 the CDC for populations with a low pre-test probability, including low or unknown prevalence of disease  
194 [10]. In such conditions, an initial antibody assay is performed, and then on all positive tests, a secondary  
195 assay with a different or more focused target is performed. In this study, the Ortho Clinical assay  
196 (targeting the total protein - S1 and S2 subunits) was used as the primary assay, followed by the Siemens  
197 SARS-CoV-2 IgG assay solely targeting the S1 unit receptor binding domain (RBD) (Siemens  
198 Healthineers, Erlangen, Germany). Additionally, to assess the antibody response in children to different  
199 SARS-CoV-2 antigens, all initially reactive samples were tested using the Abbot nucleocapsid IgG  
200 antibody assay (Abbott Laboratories, Chicago, IL). Furthermore, a random 10% sample of the initial  
201 non-reactive samples on the Ortho Clinical assay were analyzed on the Siemens (RBD) and Abbot  
202 (nucleocapsid) IgG assays.

203 Sample size justification was based on early estimates suggesting a SARS-CoV-2 seroprevalence in  
204 children of approximately 1% [4]. Thus, in order to estimate the seropositivity in demographic subgroups  
205 while considering the clustering effect due to testing at different enrollment sites, 80% Wilson score  
206 intervals were used to determine a total sample size of at least 1,000 children.

207 Statistical analysis methods included both comprehensive descriptive statistics and statistical modeling.  
208 Positive frequency counts were used to estimate both the overall and subgroup prevalence rates to  
209 delineate the effects of different factors. The corresponding Wilson score intervals provided the  
210 uncertainty quantification of the prevalence estimates. Graphical diagnostics and chi-squared tests of  
211 independence were used to determine whether selected covariates were correlated. Univariate and  
212 multivariate logistic regression analyses of antibody presence were used to explore potential effects from  
213 covariates. A final logistic regression model was chosen using a stepwise model selection. Odds ratios  
214 with corresponding confidence intervals were calculated for the coefficients in the model. The  
215 distribution of antibody titer levels across different factor levels was examined. Kruskal-Wallis tests were  
216 used to determine if these distributions differed across potential risk factors. Simple inter-rater reliability  
217 rates were calculated to assess orthogonal testing results. R version 4.0.3 was used to perform statistical  
218 analyses.

## 219 **Results**

220 This study included 1038 children. Demographic and clinical data are shown in Table 1. All age groups  
221 between 0–19 years were well represented, and racial and ethnic diversity was reflective of the Northern  
222 Virginia populace.

223 Table 1 shows the prevalence rates for anti-SARS-CoV-2 total antibody (Ortho Clinical assay) across  
224 demographic and clinical covariates of interest. The overall positivity rate for anti-SARS-CoV-2 total  
225 antibody was 8.5% (88/1038). SARS-CoV-2 antibodies were found in 8.2% of White children, 5.2% of  
226 Black or African American children, 5.7% of Asian children, and 16.2% of children identified as other



227 racial origin. When compared by age groups a bimodal distribution was noted with a seropositive rate of  
228 13.7% in young children 0–5 years, 7.5% in school-age children 6–10 years, 5.1% in early adolescents  
229 11–15 years and 10.8% in older adolescents 16–19 years (Supplemental Figure 1).

230 Especially high prevalence rates were noted in children with Hispanic ethnicity (26.8%, 55/207), those  
231 with public insurance (Medicaid, 21.6% 27/125), those without insurance (55.0%, 11/20), children living  
232 in multi-family or apartment dwellings without a private entrance (28.7%, 33/115), and children recruited  
233 from safety net primary care clinic (primary care location 2, 25%, 16/64) (Figure 1).

234 Of children exposed to an individual with a known history of COVID-19, 33.0% (35/106) had antibodies.  
235 Living in the same household with a person who tested positive for SARS-CoV-2 increased the  
236 seroprevalence rate to 52.5% (31/59). Having a personal history of symptoms consistent with COVID-19  
237 was associated with a seroprevalence of 11.8% (30/255). However, 65.9% (58/88) of children with  
238 positive antibody testing had no personal history of symptoms, and 54.6% (48/88) had no known  
239 exposure.

240 After multiple regression, significant factors associated with seropositivity were found to include  
241 ethnicity, age group, insurance status, symptoms consistent with COVID-19, having a household member  
242 test positive for COVID-19 and dwelling type (Table 2).

243 A final multivariate logistic regression model was chosen using stepwise model selection. Remaining  
244 significant predictors included Hispanic ethnicity, lack of insurance or public insurance, a history of  
245 symptoms suggestive of COVID-19, exposure to an individual with a history of COVID-19, a household  
246 member testing positive for COVID-19, and living in a multi-family or apartment dwelling without  
247 private entrance (Table 3).

248 Of those who tested positive for anti-SARS-CoV-2, titer levels ranged from 1.05 to 1000 S/Co. Across  
249 all age groups, titer levels did not significantly differ (Kruskal-Wallis,  $p=0.088$ ) (Supplemental Figure 2).

250 There was no significant difference in titer levels between those with no symptoms, those with symptoms

251 within 2 weeks of testing, and those with symptoms more than 2 weeks before testing ( $p$ -value=0.893,  
252 Kruskal-Wallis) (Supplemental Figure 3).

253 Orthogonal testing was performed on 87/88 reactive samples (where enough serum remained) using the  
254 Siemens assay against the S1/RBD target. This demonstrated an 80.5% agreement with 70/87 samples  
255 reactive. Those with lower titer levels on the Ortho Clinical assay were more likely to test negative on the  
256 Siemens assay ( $p$ =0.001, logistic regression) and older individuals were more likely to test negative  
257 ( $p$ =0.011, logistic regression); Figure 2a. There was no significant difference between those with recent  
258 symptoms within 2 weeks versus those with more remote symptoms in negative results on orthogonal  
259 testing.

260 When comparing reactive samples from the Ortho Clinical assay with the Abbot assay targeting the  
261 nucleocapsid antigen there was a 79.3% agreement with 69/87 samples testing positive. Those in older  
262 age groups were more likely to test negative on the Abbot assay ( $p$ =0.001, logistic regression) but there  
263 was no significant change among titer levels ( $p$ =0.177, logistic regression); Figure 2b.

264 A random selection of 98 samples (approximately 10%) that tested non-reactive on the Ortho Clinical  
265 assay were tested on both the Abbot and Siemens assays. All samples were negative on the additional two  
266 assays.

## 267 **Discussion**

268 Using the Ortho Clinical anti-SARS-CoV-2 antibody assay, it was determined that the seroprevalence of  
269 SARS-CoV-2 in children in Northern Virginia was as high as 8.5% (95% CI 6.9-10.3) in the fall of 2020.  
270 In contrast, the concurrently reported prevalence of SARS-CoV-2 in children in Virginia and throughout  
271 the US, based on molecular and antigen tests at the time of study completion, was around 1% [11]. Our  
272 seropositive rate of infection in children was almost 8 times the reported prevalence based on real-time  
273 viral testing.

274 An independently determined Northern Virginia adult seroprevalence was 4.4% in a similar study that  
275 concluded 2 months prior to this pediatric study (personal communication, author Christopher Difillipi).  
276 As of mid-October, the Centers for Disease Control reported a Virginia adult seroprevalence of 4.1%  
277 [12]. The seropositivity rate in children in this current study was more than double the reported  
278 concurrent adult seroprevalence.

279 The higher than expected pediatric seropositivity rate in our study is in part likely attributable to  
280 continued viral transmission over time. In addition, early in the pandemic, it was perceived that children  
281 were at reduced risk for acquiring COVID-19, either from innate protective physiologic characteristics or  
282 reduced exposure [1,3]. Schools closed rapidly at the start of the pandemic with reduced communal  
283 exposure. However, the unrecognized burden of mild or asymptomatic disease, resulted in testing bias  
284 and under-representation of children in early testing schemes [1, 13-15]. The high SARS-CoV-2  
285 seropositivity in children we identified was an unexpected finding and it has important implications for  
286 this silent burden of disease and risk of transmission to and from children.

287 In our population, after multi-regression analysis, identified significant risk factors for seropositivity  
288 included: age-group, Hispanic ethnicity, insurance status, and residence within a multi-family dwelling or  
289 apartment without a private entrance. The highest risk belonged to children living in the same home as an  
290 individual who had tested positive for SARS-CoV-2, with an odds ratio of 22.

291 Children under 5 years were statistically more likely to be seropositive for SARS-CoV-2 compared with  
292 other age groups in univariate analysis. This finding was also surprising and has implications for the need  
293 for different considerations in mitigation and protection strategies in the younger age groups. Neither the  
294 Spanish nor Switzerland cohorts examined children <5 years, but adolescents (ages 10-19) in Switzerland  
295 were more likely to test positive for antibodies than younger children (ages 5-9) [3,4]. Young children are  
296 cared for more closely by adults with possible higher risk of exposure due to prolonged physical  
297 proximity and are more likely to interact with each other with less protection. Additionally, even though  
298 there was an indoor mask mandate outside the home, this was only for children  $\geq 10$  years. Moreover,

299 even as public schools were closed for in-person learning, some childcare facilities for younger children  
300 remained open. However, consistent with other reports, our analyses did not indicate a significant  
301 difference in seropositivity in children cared for outside of their home, probably because greater efforts  
302 are taken to prevent transmission in childcare settings [16].

303 The majority of children with anti-SARS-CoV-2 antibodies in this cohort (66%) did not recall having  
304 symptoms of COVID-19. While the veracity of this is affected by recall bias, this highlights the high  
305 proportion of infections that are asymptomatic in the pediatric population and the subsequent risk of  
306 transmission to other vulnerable persons.

307 For seropositive individuals, mean antibody titers did not appear to differ between those with or without  
308 symptoms, recent or remote. It is interesting that for some seropositive children, symptoms were reported  
309 <2 weeks from testing as the reported kinetics of the antibody response to SARS-CoV-2 demonstrate that  
310 at least a week is necessary to mount IgM responses after onset of symptomatic disease [15]. Since  
311 COVID-19 symptoms overlap greatly with other childhood viral syndromes, it is possible that these  
312 reported symptoms were not truly caused by COVID-19 infection. It is also possible that some children  
313 with remote symptomatology had seroreversion and so were not captured in the positive cohort [17,18].

314 Exposure to infectious persons with COVID-19 is a well-recognized risk factor for acquiring COVID-19  
315 and our analysis confirms this [19-22]. Consistent with other reports, the household attack rate was even  
316 higher; over 50% of children reported as exposed to a test-positive household member were seropositive  
317 [23]. Conversely, almost 60% of seropositive children had no known contact with test-positive SARS-  
318 CoV-2. This emphasizes the insidious effects of asymptomatic spread with viral shedding in symptomatic  
319 and asymptomatic individuals [24].

320 Ethnically and socioeconomically marginalized groups unable to shelter in place have shouldered a  
321 disproportionate burden of COVID-19 disease globally [23,26,27]. Hispanic ethnicity, the dominant  
322 minority in Northern Virginia, conferred four-fold odds of seropositivity. Publicly provided health

323 insurance and lack of insurance is an accepted marker for lower socioeconomic status, and families with  
324 limited financial means are more likely to live in multi-family dwellings with a common entrance.  
325 Significantly higher seropositivity rates in each of these groups demonstrated the disproportionate impact  
326 of COVID-19 on the underprivileged.

327 Orthogonal testing with an antibody assay specific to the S1/RBD antigen of the spike protein  
328 demonstrated high concordance. Those samples which failed to show concordance in orthogonal testing  
329 to the S1/RBD exhibited very low titers to the full spike protein (Ortho Clinical assay). Future  
330 consideration should be given to redefining the lower limit of detection for full spike protein antibody  
331 assays as it is possible that these lower titer levels may represent cross-reactivity to conserved epitopes in  
332 benign seasonal human coronaviruses [8]. In addition, some samples that may have been negative on  
333 orthogonal testing may have been due to the Ortho Clinical assay also detecting IgM; however those  
334 negative on orthogonal testing were not more likely to have recent symptoms consistent with COVID-19  
335 within 2 weeks of antibody testing.

336 Children with a response to the full spike protein assay also frequently manifested antibodies to the  
337 nucleocapsid antigen. Interestingly, it was those in older age groups that more likely failed to produce a  
338 nucleocapsid antibody response, contrary to previously published data suggesting that young children  
339 may fail to elicit a nucleocapsid antibody response [7].

#### 340 **Limitations**

341 There are several potential limitations to this investigation. Selection bias may have affected the  
342 representativeness of the regional population, as it was focused on children having blood drawn for  
343 another clinical purpose and self-referral for the study. However, these factors are accounted for in this  
344 analysis. In addition, Northern Virginia is a major metropolitan area, and so results may not be  
345 generalizable to areas that have more rural demographics. As noted, cross-reaction with other common  
346 endemic human beta-coronaviruses may result in false positive antibody results, particularly at currently

347 defined thresholds [8]. Conversely, seroreversion may produce false negative results in more remote  
348 infections [23,24]. Most importantly, this study took place at a specific point in time and represents a  
349 static snapshot of a dynamic event [4].

## 350 **Conclusions**

351 A much higher pediatric SARS-CoV-2 burden was found than has previously been reported in the US;  
352 this rate was also higher than in adults in the same region over a similar time period. These seropositive  
353 rates were following the period after the first peak of infection in the community, when schools were  
354 closed, and social mitigation strategies were mandated. Contrary to reporting early in the COVID-19  
355 pandemic, this study determined that children experience a significant burden of COVID-19 infection.  
356 Children appear very important in the transmission of disease, including silent transmission, and with  
357 such continued protection of children through social mitigation strategies and extending COVID-19  
358 vaccines to children are imperative to achieving control of this pandemic.

359

360

361

362

363

364

365

366

367

368

369

370

371 **Acknowledgements**

372 We recognize the efforts of all team members at the multiple study sites who have supported this  
373 study and encouraged participation. This project would not have been possible without the  
374 support of Dr. David Trump and the Virginia Department of Health, the help of Dr. John Farrell  
375 and Dr. Dina Gottsman and the pediatric team at Farrell Pediatrics, Dr. Albert Brito and the  
376 pediatric team at Inova Cares Clinic for Children, Dr. Sandy Chung and the pediatric team at  
377 Fairfax Pediatrics, and Dr. Christina Ulen, Ms. Lori Schubert, and the pediatric team at  
378 Advanced Pediatrics, Dr. Elizabeth Yang and the pediatric teams at Pediatric Specialists of  
379 Virginia, the pediatric teams at Inova Children’s Hospital. We recognize and thank all of the  
380 participants of the study and their families; such studies can only happen because people find  
381 that helping in research, especially in the midst of a pandemic, is worthwhile, and therefore,  
382 choose to join.

## References

1. CDC COVID-19 Response Team. Coronavirus Disease 2019 in Children - United States, February 12-April 2, 2020. *MMWR Morb Mortal Wkly Rep.* 2020;69(14):422-426.
2. Pan Y, Li X, Yang G, et al. Seroprevalence of SARS-CoV-2 immunoglobulin antibodies in Wuhan, China: part of the city-wide massive testing campaign. *Clin Microbiol Infect.* Published online October 6, 2020. doi:10.1016/j.cmi.2020.09.044
3. Pollán M, Pérez-Gómez B, Pastor-Barriuso R, et al. Prevalence of SARS-CoV-2 in Spain (ENE-COVID): a nationwide, population-based seroepidemiological study. *Lancet.* 2020;396(10250):535-544.
4. Stringhini S, Wisniak A, Piumatti G, et al. Seroprevalence of anti-SARS-CoV-2 IgG antibodies in Geneva, Switzerland (SEROCoV-POP): a population-based study. *Lancet.* 2020;396(10247):313-319.
5. Tönshoff B, Müller B, Elling R, et al. Prevalence of SARS-CoV-2 Infection in Children and Their Parents in Southwest Germany. *JAMA Pediatr.* Published online January 22, 2021. doi:10.1001/jamapediatrics.2021.0001
6. Torres JP, Piñera C, De La Maza V, et al. SARS-CoV-2 antibody prevalence in blood in a large school community subject to a Covid-19 outbreak: a cross-sectional study. *Clin Infect Dis.* Published online July 10, 2020. doi:10.1093/cid/ciaa955
7. Weisberg SP, Connors TJ, Zhu Y, et al. Distinct antibody responses to SARS-CoV-2 in children and adults across the COVID-19 clinical spectrum. *Nat Immunol.* 2021;22(1):25-31.
8. Ng KW, Faulkner N, Cornish GH, et al. Preexisting and de novo humoral immunity to SARS-CoV-2 in humans. *Science.* 2020;370(6522):1339-1343.
9. <https://www.fda.gov/media/136967/download> (Accessed January 14, 2021)
10. <https://www.cdc.gov/coronavirus/2019-ncov/lab/resources/antibody-tests-guidelines.html>. (Accessed December 30,2020)
11. <https://services.aap.org/en/pages/2019-novel-coronavirus-covid-19-infections/children-and-covid-19-state-level-data-report/> (accessed Nov 8, 2020)
12. [https://covid.cdc.gov/covid-data-tracker/#trends\\_totalandratercases](https://covid.cdc.gov/covid-data-tracker/#trends_totalandratercases) (Accessed Nov 8,2020)
13. DeBiasi RL, Delaney M. Symptomatic and Asymptomatic Viral Shedding in Pediatric Patients Infected With Severe Acute Respiratory Syndrome Coronavirus 2 (SARS-CoV-2): Under the Surface. *JAMA Pediatr.* Published online August 28, 2020. doi:10.1001/jamapediatrics.2020.3996
14. Han MS, Choi EH, Chang SH, et al. Clinical Characteristics and Viral RNA Detection in Children With Coronavirus Disease 2019 in the Republic of Korea. *JAMA Pediatr.* Published online August 28, 2020. doi:10.1001/jamapediatrics.2020.3988



15. Sethuraman N, Jeremiah SS, Ryo A. Interpreting Diagnostic Tests for SARS-CoV-2. *JAMA*. 2020;323(22):2249-2251.
16. Link-Gelles R, DellaGrotta AL, Molina C, et al. Limited Secondary Transmission of SARS-CoV-2 in Child Care Programs - Rhode Island, June 1-July 31, 2020. *MMWR Morb Mortal Wkly Rep*. 2020;69(34):1170-1172.
17. Zimmermann P, Curtis N. Coronavirus Infections in Children Including COVID-19: An Overview of the Epidemiology, Clinical Features, Diagnosis, Treatment and Prevention Options in Children. *Pediatr Infect Dis J*. 2020;39(5):355-368.
18. Self WH, Tenforde MW, Stubblefield WB, et al. Decline in SARS-CoV-2 Antibodies After Mild Infection Among Frontline Health Care Personnel in a Multistate Hospital Network - 12 States, April-August 2020. *MMWR Morb Mortal Wkly Rep*. 2020;69(47):1762-1766.
19. Hobbs CV, Martin LM, Kim SS, et al. Factors Associated with Positive SARS-CoV-2 Test Results in Outpatient Health Facilities and Emergency Departments Among Children and Adolescents Aged <18 Years - Mississippi, September-November 2020. *MMWR Morb Mortal Wkly Rep*. 2020;69(50):1925-1929.
20. Madewell ZJ, Yang Y, Longini IM Jr, Halloran ME, Dean NE. Household Transmission of SARS-CoV-2: A Systematic Review and Meta-analysis. *JAMA Netw Open*. 2020;3(12):e2031756.
21. Grijalva CG, Rolfes MA, Zhu Y, et al. Transmission of SARS-COV-2 Infections in Households - Tennessee and Wisconsin, April-September 2020. *MMWR Morb Mortal Wkly Rep*. 2020;69(44):1631-1634.
22. Gudbjartsson DF, Norddahl GL, Melsted P, et al. Humoral Immune Response to SARS-CoV-2 in Iceland. *N Engl J Med*. 2020;383(18):1724-1734.
23. Bailey LC, Razzaghi H, Burrows EK, et al. Assessment of 135 794 Pediatric Patients Tested for Severe Acute Respiratory Syndrome Coronavirus 2 Across the United States. *JAMA Pediatr*. Published online November 23, 2020. doi:10.1001/jamapediatrics.2020.5052
24. Cevik M, Tate M, Lloyd O, Maraolo AE, Schafers J, Ho A. SARS-CoV-2, SARS-CoV, and MERS-CoV viral load dynamics, duration of viral shedding, and infectiousness: a systematic review and meta-analysis. *The Lancet Microbe*. Published online November 19, 2020. doi:10.1016/S2666-5247(20)30172-5
25. Leeb RT, Price S, Sliwa S, et al. COVID-19 Trends Among School-Aged Children - United States, March 1-September 19, 2020. *MMWR Morb Mortal Wkly Rep*. 2020;69(39):1410-1415.
26. Whittaker E, Bamford A, Kenny J, et al. Clinical Characteristics of 58 Children With a Pediatric Inflammatory Multisystem Syndrome Temporally Associated With SARS-CoV-2. *JAMA*. 2020;324(3):259-269.
27. DeBiasi RL, Song X, Delaney M, et al. Severe Coronavirus Disease-2019 in Children and Young Adults in the Washington, DC, Metropolitan Region. *J Pediatr*. 2020;223:199-203.e1.

## Figure Legends:

Figure 1: Wilson Score intervals for selected covariates of interest.

Figure 2. Scatterplots showing age versus titer levels of the reactive tests on the Ortho Clinical Diagnostic Vitros assay, with orthogonal testing on the Siemens assay (2a) and Abbot assay (2b). Negative tests on orthogonal testing are colored red.

Supplemental Figure 1: Pairwise plot of age vs. seropositivity rate (%). The red points represent the observed positivity rate in the cohort at each age, and the line is the predicted positivity rate produced by a quadratic regression model. The estimated seropositivity rate is higher for younger and older ages of children.

Supplemental figure 2: A multiple boxplot that shows the SARS-CoV-2 total spike protein titer levels (S/Co) for those who tested positive separated by age group and summary statistics.

Supplemental Figure 3: A multiple boxplot that showing SARS-CoV-2 total spike protein titer levels (S/Co) for those who tested positive separated by presence of symptoms and summary statistics.

| <b>Table 1: Demographic Information, Prevalence Rates, and 95% Wilson Score Intervals</b> |                                           |              |                                  |                                   |                    |
|-------------------------------------------------------------------------------------------|-------------------------------------------|--------------|----------------------------------|-----------------------------------|--------------------|
| <b>*Indicates an unreliable estimate due to a small count</b>                             |                                           |              |                                  |                                   |                    |
| <b>Variable</b>                                                                           | <b>Category</b>                           | <b>Count</b> | <b>Estimated Prevalence Rate</b> | <b>95% Wilson Score Intervals</b> |                    |
|                                                                                           |                                           |              |                                  | <b>Lower Bound</b>                | <b>Upper Bound</b> |
| Overall                                                                                   |                                           | 1038         | 8.5%                             | 6.9%                              | 10.3%              |
| Gender                                                                                    | Male                                      | 499          | 8.4%                             | 6.3%                              | 11.2%              |
|                                                                                           | Female                                    | 536          | 8.6%                             | 6.5%                              | 11.3%              |
|                                                                                           | Not Disclosed                             | 3            | 0%*                              | 0%                                | 56.1%              |
| Age Group                                                                                 | 0 – 5 years                               | 182          | 13.7%                            | 9.5%                              | 19.5%              |
|                                                                                           | 6 – 10 years                              | 241          | 7.5%                             | 4.8%                              | 11.5%              |
|                                                                                           | 11 – 15 years                             | 374          | 5.1%                             | 3.3%                              | 7.8%               |
|                                                                                           | 16 – 19 years                             | 241          | 10.8%                            | 7.5%                              | 15.3%              |
| Race                                                                                      | White                                     | 717          | 8.2%                             | 6.4%                              | 10.5%              |
|                                                                                           | Black or African American                 | 97           | 5.2%                             | 2.2%                              | 11.5%              |
|                                                                                           | Asian                                     | 106          | 5.7%                             | 2.6%                              | 11.8%              |
|                                                                                           | American Indian or Alaska Native          | 0            | ---                              | ---                               | ---                |
|                                                                                           | Native Hawaiian or Other Pacific Islander | 2            | 0%*                              | 0%                                | 65.8%              |
|                                                                                           | Other                                     | 111          | 16.2%                            | 10.5%                             | 24.2%              |
|                                                                                           | Unknown/Declined                          | 5            | 0%*                              | 0%                                | 43.4%              |
| Ethnicity                                                                                 | Not Hispanic or Latino                    | 829          | 4.0%                             | 2.8%                              | 5.5%               |
|                                                                                           | Hispanic or Latino                        | 207          | 26.6%                            | 21.0%                             | 33.0%              |
|                                                                                           | Unknown                                   | 2            | 0%*                              | 0%                                | 65.8%              |
| Insurance                                                                                 | Private                                   | 834          | 5.3%                             | 4.0%                              | 7.0%               |
|                                                                                           | Medicaid                                  | 125          | 21.6%                            | 15.3%                             | 29.6%              |
|                                                                                           | Medicare                                  | 8            | 12.5%*                           | 2.2%                              | 47.1%              |
|                                                                                           | None or uninsured                         | 20           | 55.0%                            | 34.2%                             | 74.2%              |
|                                                                                           | Other                                     | 3            | 33.3%*                           | 6.1%                              | 79.2%              |
|                                                                                           | Don't know                                | 4            | 25.0%*                           | 4.6%                              | 69.9%              |
|                                                                                           | Military                                  | 44           | 6.8%                             | 2.3%                              | 18.2%              |
| Existing Medical Comorbidity                                                              | No                                        | 807          | 8.3%                             | 6.6%                              | 10.4%              |
|                                                                                           | Yes                                       | 225          | 8.9%                             | 5.8%                              | 13.3%              |
|                                                                                           | Don't Know                                | 3            | 0%*                              | 0%                                | 56.1%              |
|                                                                                           | Missing                                   | 3            | 33.3%                            | ---                               | ---                |
| Symptoms                                                                                  | No                                        | 774          | 7.2%                             | 5.6%                              | 9.3%               |
|                                                                                           | Yes                                       | 255          | 11.8%                            | 0%                                | 65.8%              |
|                                                                                           | Unknown                                   | 6            | 33.3%*                           | 9.7%                              | 70.0%              |

|                                        |                                                 |      |        |       |       |
|----------------------------------------|-------------------------------------------------|------|--------|-------|-------|
|                                        | Missing                                         | 3    | 0%     | ---   | ---   |
| Dwelling                               | Single-family                                   | 901  | 5.9%   | 4.5%  | 7.6%  |
|                                        | Multi-family or apartment – No Private Entrance | 115  | 28.7%  | 21.2% | 37.5% |
|                                        | Multi-family or apartment – Private Entrance    | 16   | 6.3%   | 1.1%  | 28.3% |
|                                        | Other                                           | 6    | 16.7%* | 3.0%  | 56.4% |
| Household Member Exposure              | Not Tested                                      | 543  | 6.3%   | 4.5%  | 8.6%  |
|                                        | Tested – Positive                               | 59   | 52.5%  | 40.0% | 64.7% |
|                                        | Tested – Negative                               | 415  | 5.3%   | 3.5%  | 7.9%  |
|                                        | Tested – No Results                             | 15   | 6.67%  | 1.19% | 29.8% |
|                                        | Unknown if Tested                               | 4    | 0%*    | 0%    | 49.0% |
|                                        | Missing                                         | 2    | 0%     | ---   | ---   |
| COVID-19 Exposure                      | No                                              | 911  | 5.6%   | 4.3%  | 7.3%  |
|                                        | Yes                                             | 106  | 33.0%  | 24.8% | 42.4% |
|                                        | Unknown or Missing                              | 19   | 10.5%  | 2.9%  | 31.4% |
|                                        | Missing                                         | 2    | 0%     | ---   | ---   |
| Reason for Visit                       | Specifically for COVID-19 antibody testing      | 504  | 4.6%   | 3.1%  | 6.8%  |
|                                        | New or acute illness or injury                  | 193  | 14.0%  | 9.8%  | 19.6% |
|                                        | Prevention or well visit                        | 59   | 20.3%  | 12.0% | 32.3% |
|                                        | Routine visit for a prior condition             | 193  | 8.8%   | 5.6%  | 13.7% |
|                                        | Other                                           | 84   | 10.1%  | 5.4%  | 18.1% |
| Traveled Out of the State              | No                                              | 395  | 13.4%  | 10.4% | 17.1% |
|                                        | Yes                                             | 642  | 5.5%   | 3.9%  | 7.5%  |
|                                        | Don't Know                                      | 1    | 0%*    | 0%    | 79.3% |
| Traveled Out of the Country            | No                                              | 1002 | 8.4%   | 6.8%  | 10.3% |
|                                        | Yes                                             | 36   | 11.1%  | 4.4%  | 25.3% |
| Child Cared for outside of Home        | No                                              | 729  | 8.2%   | 6.4%  | 10.5% |
|                                        | Yes                                             | 299  | 8.7%   | 6.0%  | 12.4% |
|                                        | Missing                                         | 10   | 20.0%  | ---   | ---   |
| Household Member Work Outside the Home | No work outside home                            | 383  | 6.3%   | 4.2%  | 9.2%  |
|                                        | Essential                                       | 530  | 8.7%   | 6.6%  | 11.4% |
|                                        | Unessential                                     | 121  | 14.0%  | 9.0%  | 21.4% |
|                                        | Unknown if essential                            | 3    | 33.3%* | 6.1%  | 79.2% |
|                                        | Missing                                         | 1    | 0%     | ---   | ---   |
| Enrollment Site                        | Pediatric Specialists Clinics                   | 444  | 4.7%   | 3.1%  | 7.1%  |
|                                        | Pediatric Emergency Department                  | 175  | 14.3%  | 9.9%  | 20.2% |
|                                        | Pre surgical areas                              | 89   | 6.7%   | 3.1%  | 13.9% |
|                                        | Primary Care location 1                         | 128  | 5.5%   | 2.7%  | 10.9% |
|                                        | Hematology/Oncology clinic                      | 57   | 17.5%  | 9.8%  | 29.4% |
|                                        | Primary Care location 2                         | 64   | 25.0%  | 16.0% | 36.8% |
|                                        | Pediatric Intensive Care Unit                   | 7    | 14.3%* | 2.6%  | 51.3% |
|                                        | Pediatric inpatient units                       | 6    | 0%*    | 0%    | 39.0% |
|                                        | Endoscopy suite                                 | 10   | 0%*    | 0%    | 27.8% |
|                                        | Primary Care location 3                         | 49   | 4.1%   | 1.1%  | 13.7% |

|  |                                |   |     |    |       |
|--|--------------------------------|---|-----|----|-------|
|  | All other Primary Care clinics | 9 | 0%* | 0% | 29.9% |
|--|--------------------------------|---|-----|----|-------|

**Table 2: Univariate and Multivariate Logistic Regression Results**

| Covariate                      | Covariate p-value |              | Level                                           | Level p-value |              |
|--------------------------------|-------------------|--------------|-------------------------------------------------|---------------|--------------|
|                                | Univariate        | Multivariate |                                                 | Univariate    | Multivariate |
| Gender                         | 0.763             | 0.749        | Male                                            | Baseline      |              |
|                                |                   |              | Female                                          | 0.924         | 0.998        |
|                                |                   |              | Not Disclosed                                   | 0.981         | 0.996        |
| Age Group                      | 0.003             | 0.009        | 0 – 5 years                                     | < 0.001       | 0.534        |
|                                |                   |              | 6 – 10 years                                    | 0.227         | 0.857        |
|                                |                   |              | 11 – 15 years                                   | Baseline      |              |
|                                |                   |              | 16 – 19 years                                   | 0.009         | 0.534        |
| Race                           | 0.051             | 0.143        | White                                           | Baseline      |              |
|                                |                   |              | Black or African American                       | 0.296         | 0.202        |
|                                |                   |              | Asian                                           | 0.363         | 0.701        |
|                                |                   |              | Native Hawaiian or Other Pacific Islander       | 0.990         | 0.997        |
|                                |                   |              | Other                                           | 0.008         | 0.129        |
|                                |                   |              | Unknown/Declined                                | 0.984         | 0.996        |
| Ethnicity                      | < 0.001           | < 0.001      | Not Hispanic or Latino                          | Baseline      |              |
|                                |                   |              | Hispanic or Latino                              | < 0.001       | 0.001        |
|                                |                   |              | Unknown                                         | 0.985         | 0.998        |
| Insurance                      | < 0.001           | 0.002        | Private                                         | Baseline      |              |
|                                |                   |              | Medicaid                                        | < 0.001       | 0.065        |
|                                |                   |              | Medicare                                        | 0.383         | 0.448        |
|                                |                   |              | None or uninsured                               | < 0.001       | < 0.001      |
|                                |                   |              | Other                                           | 0.075         | 0.126        |
|                                |                   |              | Don't know                                      | 0.125         | 0.802        |
|                                |                   |              | Military                                        | 0.659         | 0.046        |
| Existing Medical Comorbidities | 0.739             | 0.554        | No                                              | Baseline      |              |
|                                |                   |              | Yes                                             | 0.780         | 0.518        |
|                                |                   |              | Don't know                                      | 0.981         | 0.996        |
| Symptoms                       | 0.021             | 0.033        | No                                              | Baseline      |              |
|                                |                   |              | Yes                                             | 0.025         | 0.025        |
|                                |                   |              | Unknown                                         | 0.034         | 0.464        |
| Dwelling                       | < 0.001           | 0.005        | Single-family                                   | Baseline      |              |
|                                |                   |              | Multi-family or apartment – no private entrance | < 0.001       | 0.006        |
|                                |                   |              | Multi-family or apartment– private              | 0.951         | 0.734        |

|                                      |         |         |                                         |          |         |
|--------------------------------------|---------|---------|-----------------------------------------|----------|---------|
|                                      |         |         | entrance                                |          |         |
|                                      |         |         | Other                                   | 0.292    | 0.554   |
| Household Member Tested for COVID-19 | < 0.001 | < 0.001 | Not Tested                              | Baseline |         |
|                                      |         |         | Tested – Positive                       | < 0.001  | < 0.001 |
|                                      |         |         | Tested – Negative                       | 0.531    | 0.097   |
|                                      |         |         | Tested – No Results                     | 0.949    | 0.655   |
|                                      |         |         | Unknown if Tested                       | 0.986    | 0.997   |
| Child Exposed to COVID-19            | < 0.001 | 0.056   | No                                      | Baseline |         |
|                                      |         |         | Yes                                     | < 0.001  | 0.114   |
|                                      |         |         | Unknown                                 | 0.368    | 0.066   |
| Traveled Out of State                | < 0.001 | 0.218   | No                                      | Baseline |         |
|                                      |         |         | Yes                                     | < 0.001  | 0.114   |
|                                      |         |         | Unknown                                 | 0.983    | 0.998   |
| Traveled Out of Country              | 0.580   | 0.234   | No                                      | Baseline |         |
|                                      |         |         | Yes                                     | 0.565    | 0.076   |
| Reason for Visit                     | < 0.001 | 0.243   | Specifically for COVID antibody testing | Baseline |         |
|                                      |         |         | New or acute illness or injury          | < 0.001  | 0.287   |
|                                      |         |         | Prevention or well visit                | < 0.001  | 0.422   |
|                                      |         |         | Routine visit for a prior condition     | 0.034    | 0.343   |
|                                      |         |         | Other                                   | 0.038    | 0.596   |
| Work Out of Home                     | 0.041   | 0.222   | None                                    | Baseline |         |
|                                      |         |         | Essential                               | 0.178    | 0.424   |
|                                      |         |         | Unessential                             | 0.008    | 0.173   |
|                                      |         |         | Yes, Not Sure if Essential              | 0.105    | 0.657   |
| Childcare out of Home                | 0.807   | 0.056   | No                                      | Baseline |         |
|                                      |         |         | Yes                                     | 0.807    | 0.052   |
| Household Size                       | 0.239   | 0.439   | ---                                     | 0.230    | 0.283   |
| Children in Household                | 0.145   | 0.013   | ---                                     | 0.154    | 0.014   |
| Enrollment Site                      | < 0.001 | 0.883   | Pediatric Emergency Department          | Baseline |         |
|                                      |         |         | Pre surgical areas                      | 0.079    | 0.539   |
|                                      |         |         | Primary Care location 1                 | 0.017    | 0.899   |
|                                      |         |         | Pediatric Specialists Clinics           | < 0.001  | 0.879   |
|                                      |         |         | Hematology/Oncology clinic              | 0.551    | 0.378   |

|  |  |  |                                |       |       |
|--|--|--|--------------------------------|-------|-------|
|  |  |  | Primary Care location 2        | 0.055 | 0.543 |
|  |  |  | Pediatric Intensive Care Unit  | 1.000 | 0.778 |
|  |  |  | Pediatric inpatient units      | 0.988 | 0.995 |
|  |  |  | Endoscopy suite                | 0.985 | 0.993 |
|  |  |  | Primary Care location 3        | 0.070 | 0.726 |
|  |  |  | All other Primary Care clinics | 0.985 | 0.995 |

**Table 3: Odds Ratio Estimates and p-values for Chosen Covariates**

| Covariate                              | Level                              | Univariate Analysis |         | Multivariate Analysis |         |
|----------------------------------------|------------------------------------|---------------------|---------|-----------------------|---------|
|                                        |                                    | OR (95% CI)         | p-value | OR (95% CI)           | p-value |
| Ethnicity                              | Not Hispanic or Latino             | Baseline            |         | Baseline              |         |
|                                        | Hispanic or Latino                 | 8.73 (5.51, 14.02)  | < 0.001 | 4.22 (2.26, 7.94)     | < 0.001 |
|                                        | Unknown                            | ---                 | 0.985   | ---                   | 0.994   |
| Insurance                              | Private                            | Baseline            |         | Baseline              |         |
|                                        | Medicaid                           | 4.95 (2.91, 8.31)   | < 0.001 | 2.45 (1.10, 5.39)     | 0.027   |
|                                        | Medicare                           | 2.56 (0.14, 14.86)  | 0.383   | 0.47 (0.01, 7.05)     | 0.628   |
|                                        | None or uninsured                  | 21.94 (8.65, 57.16) | < 0.001 | 11.95 ( 3.71, 38.43)  | < 0.001 |
|                                        | Other                              | 8.98 (0.41, 95.46)  | 0.075   | 5.11 (0.22, 60.29)    | 0.206   |
|                                        | Don't know                         | 5.98 (0.29, 47.83)  | 0.125   | 1.93 ( 0.08, 19.29)   | 0.603   |
|                                        | Military                           | 1.31 (0.31, 3.80)   | 0.659   | 3.37 ( 0.73, 11.40)   | 0.075   |
| Symptoms                               | No                                 | Baseline            |         | Baseline              |         |
|                                        | Yes                                | 1.71 (1.06, 2.71)   | 0.025   | 1.99 (1.05, 3.72)     | 0.033   |
|                                        | Unknown                            | 6.41 (0.88, 33.59)  | 0.034   | 4.36 (0.27, 53.50)    | 0.292   |
| Dwelling                               | Single-family                      | Baseline            |         | Baseline              |         |
|                                        | Multi-family – no private entrance | 6.44 (3.92, 10.48)  | < 0.001 | 3.19 (1.57, 6.43)     | 0.001   |
|                                        | Multi-family – private entrance    | 1.07 (0.06, 5.42)   | 0.951   | 0.71 (0.04, 4.63)     | 0.765   |
|                                        | Other                              | 3.20 (0.17, 20.31)  | 0.292   | 1.15 (0.03, 17.95)    | 0.931   |
| Household Member COVID-19 Test Results | Not Tested                         | Baseline            |         | Baseline              |         |
|                                        | Tested – Positive                  | 16.57 (8.98, 31.02) | < 0.001 | 9.65 (3.34, 30.55)    | < 0.001 |
|                                        | Tested – Negative                  | 0.84 (0.48, 1.45)   | 0.531   | 0.69 (0.35, 1.33)     | 0.281   |
|                                        | Tested – No Results                | 1.07 (0.06, 5.57)   | 0.949   | 2.36 (0.12, 15.00)    | 0.446   |
|                                        | Unknown if Tested                  | ---                 | 0.986   | ---                   | 0.993   |
| Child Exposed to COVID-19              | No                                 | Baseline            |         | Baseline              |         |
|                                        | Yes                                | 8.31 (5.06, 13.60)  | < 0.001 | 2.93 (1.06, 7.45)     | 0.030   |



|                     |         |                   |         |                    |       |
|---------------------|---------|-------------------|---------|--------------------|-------|
|                     | Unknown | 1.98 (0.31, 7.18) | 0.368   | 3.22 (0.46, 13.79) | 0.160 |
| Travel Out of State | No      | Baseline          |         | Baseline           |       |
|                     | Yes     | 0.37 (0.24, 0.58) | < 0.001 | 0.53 (0.28, 0.98)  | 0.045 |
|                     | Unknown | ---               | 0.983   | ---                | 0.995 |
| Number of Children  |         | 0.84 (0.66, 1.06) | 0.154   | 0.67 (0.48, 0.92)  | 0.016 |

# Wilson Score Intervals for Selected Categories

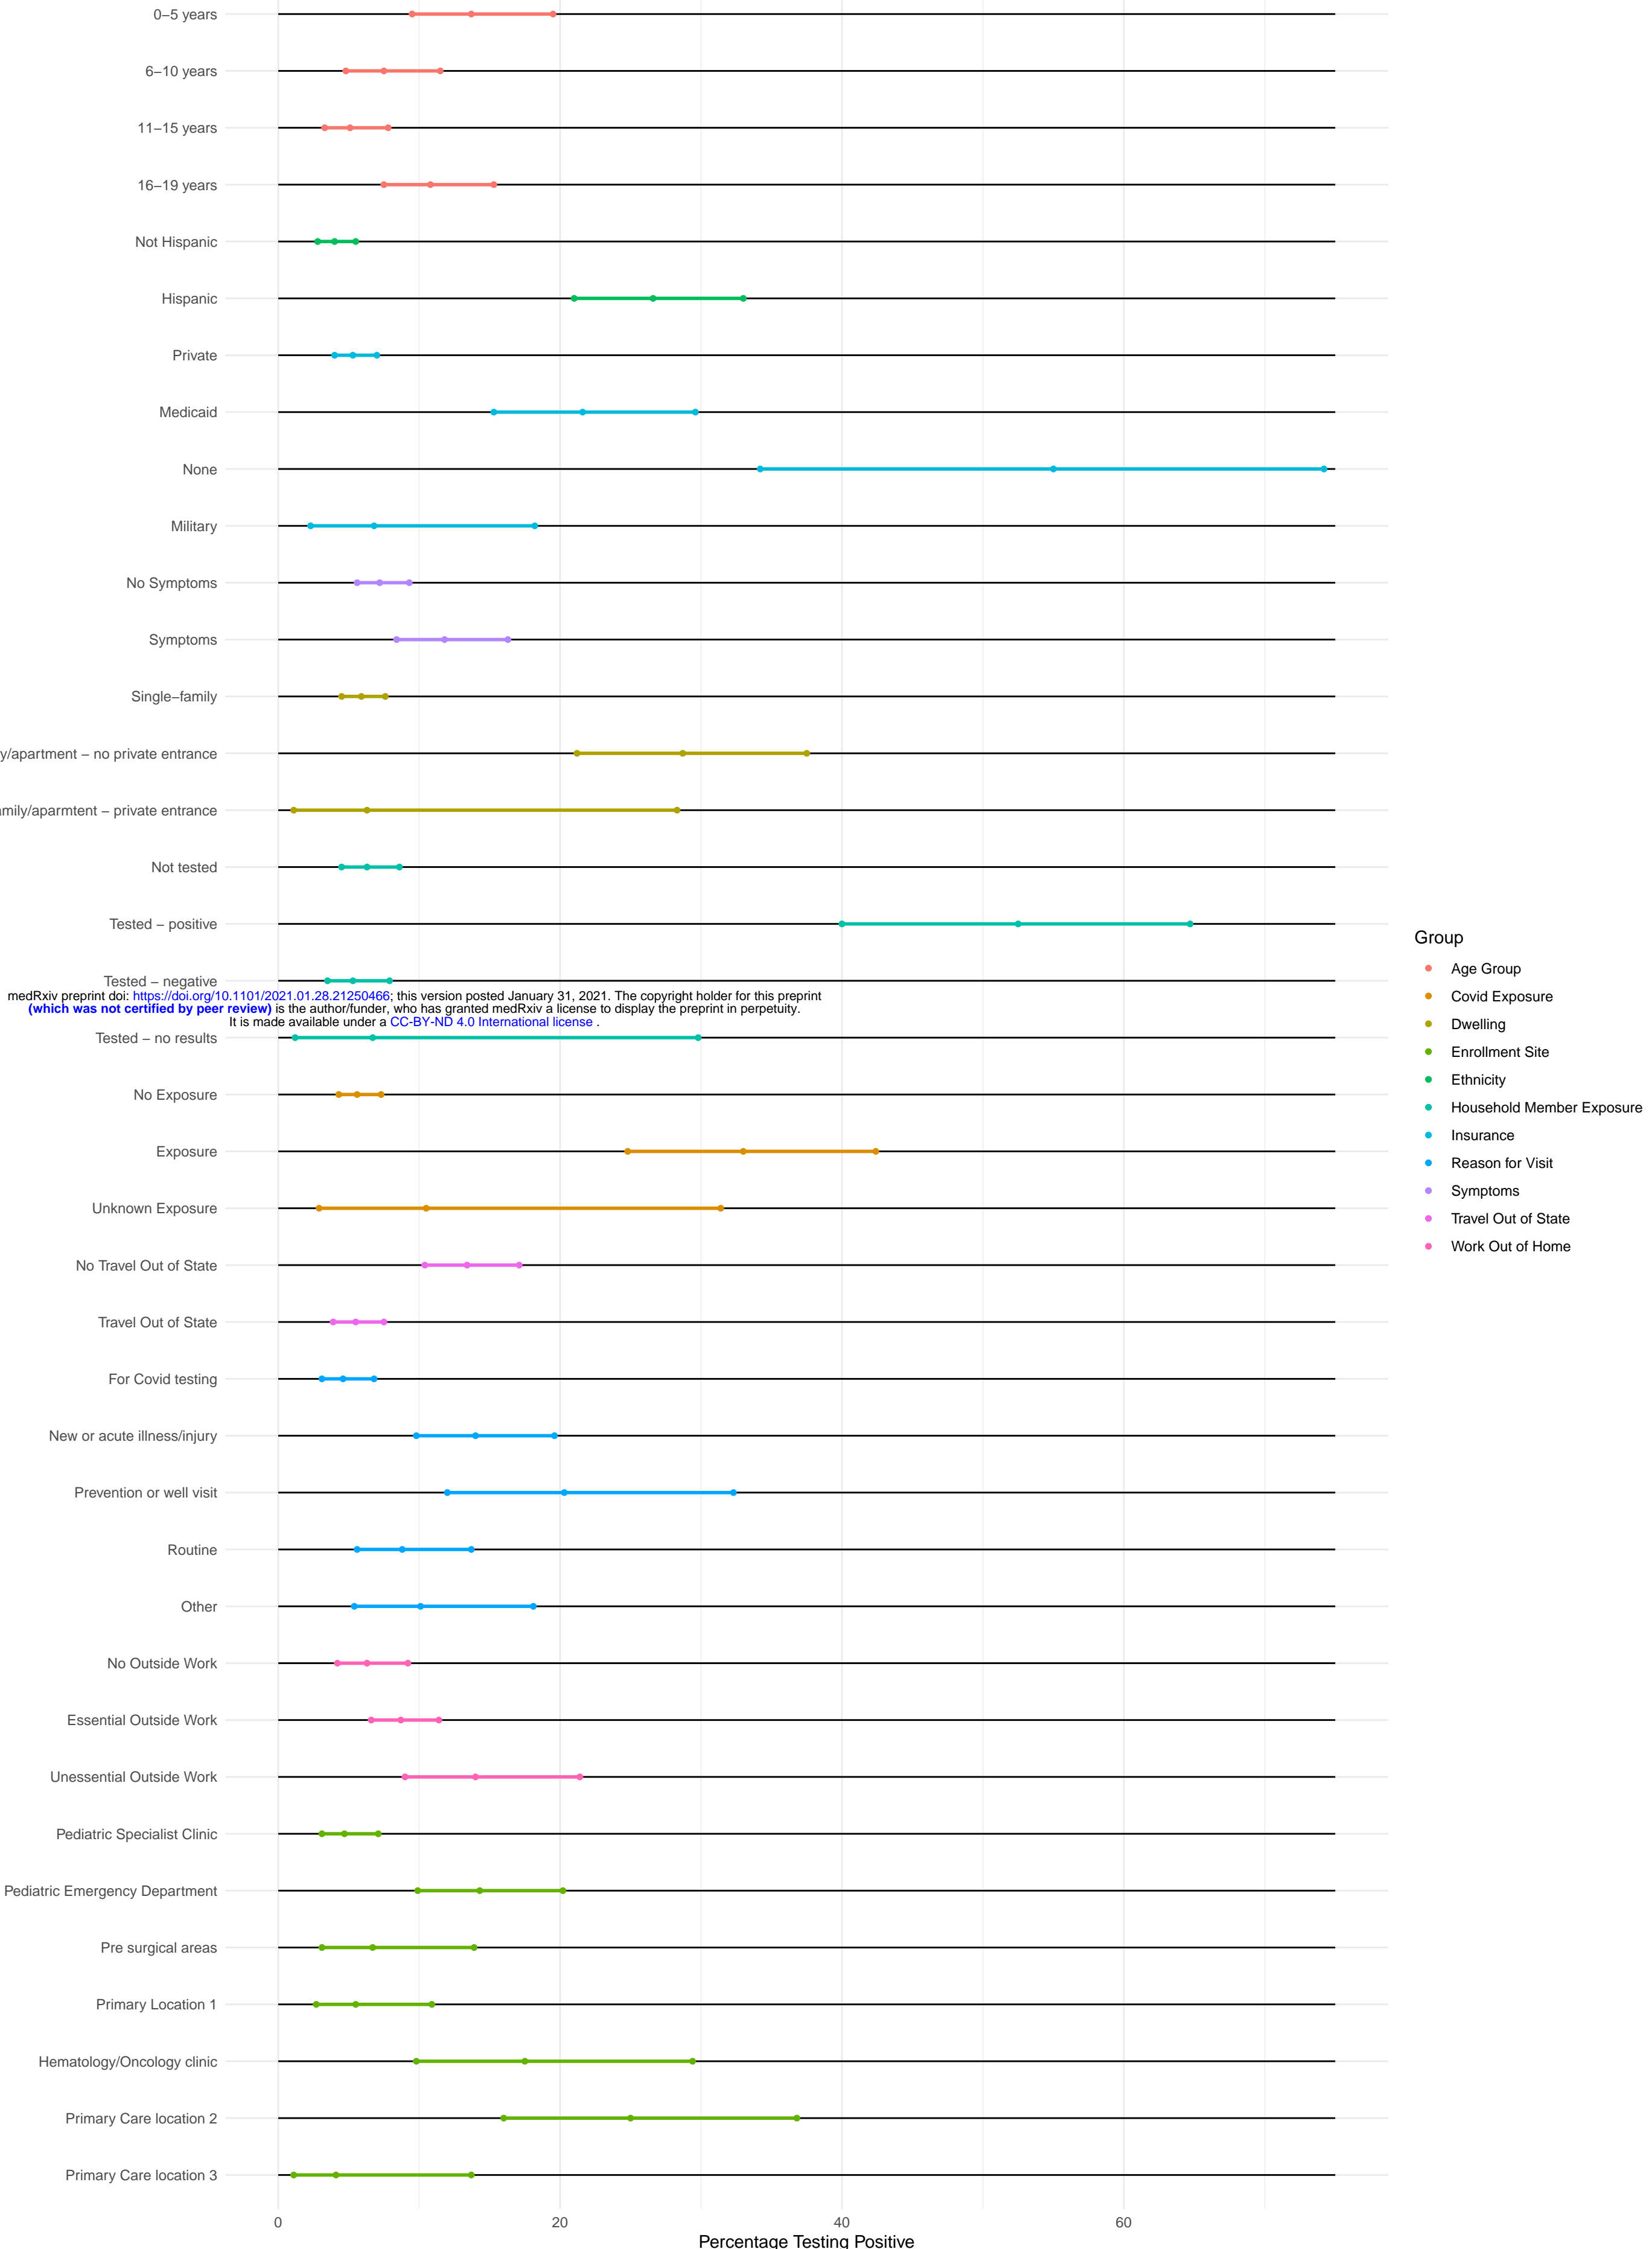

**Siemens Test Results Among  
Positive Ortho Tests**

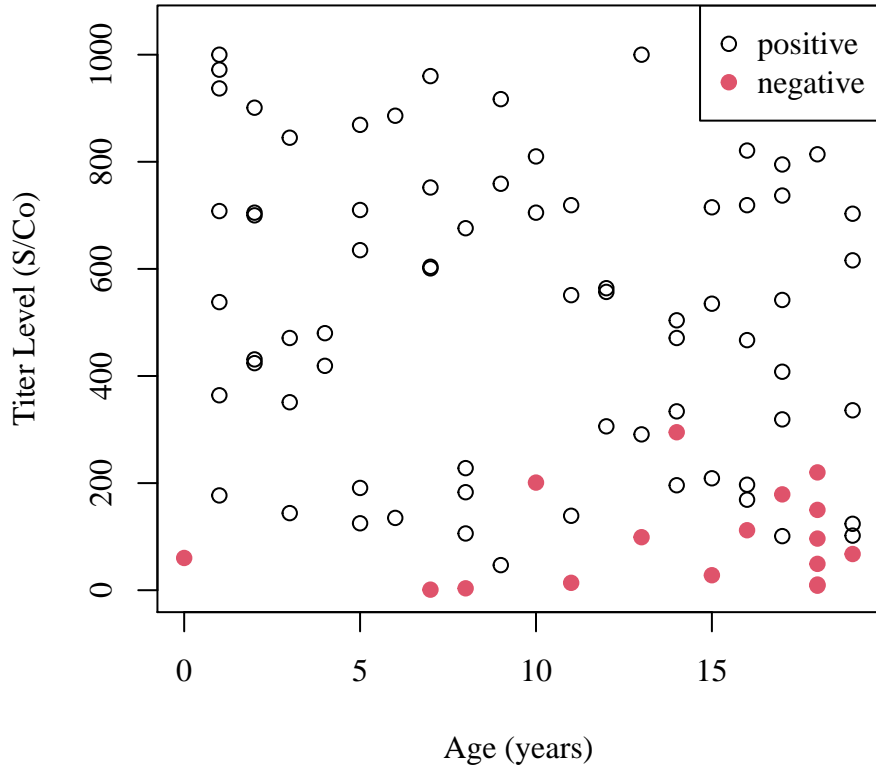

**Abbot Architect Results Among  
Positive Ortho Tests**

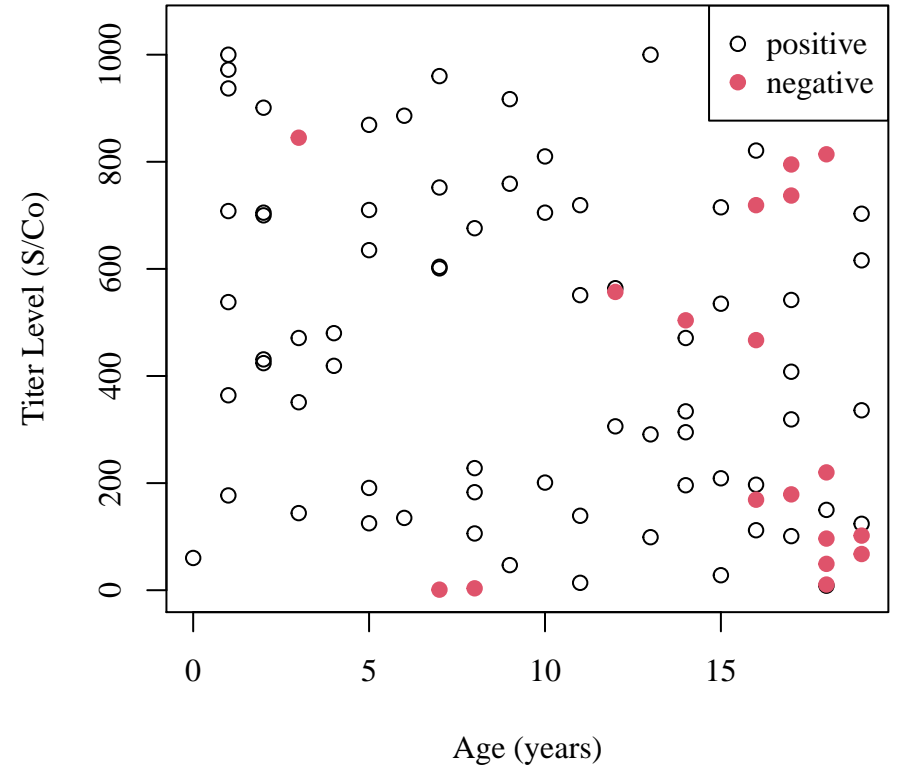

Source: https://medrxiv.org/content/10.1101/2021.01.28.21250466.full.pdf
